# Epb4115 competes with Delta as a substrate for Mib1 to coordinate specification and differentiation of neurons

Miho Matsuda<sup>1,2,\*</sup>, Kinneret Rand<sup>2</sup>, Greg Palardy<sup>2</sup>, Nobuyuki Shimizu<sup>1</sup>, Hiromi Ikeda<sup>2</sup>, Damian Dalle Nogare<sup>2</sup>, Motoyuki Itoh<sup>2,3</sup> and Ajay B. Chitnis<sup>2,\*</sup>

## ABSTRACT

We identified Erythrocyte membrane protein band 4.1-like 5 (Epb4115) as a substrate for the E3 ubiquitin ligase Mind bomb 1 (Mib1), which is essential for activation of Notch signaling. Although loss of Epb4115 does not significantly alter the pattern of neural progenitor cells (NPCs) specified as neurons at the neural plate stage, it delays their delamination and differentiation after neurulation when NPCs normally acquire organized apical junctional complexes (AJCs) in the zebrafish hindbrain. Delays in differentiation are reduced by knocking down N-cadherin, a manipulation expected to help destabilize adherens junctions (AJs). This suggested that delays in neuronal differentiation in *epb4115*-deficient embryos are related to a previously described role for Epb4115 in facilitating disassembly of cadherin-dependent AJCs. Mib1 ubiquitylates Epb4115 to promote its degradation. DeltaD can compete with Epb4115 to reduce Mib1-dependent Epb4115 degradation. In this context, increasing the number of NPCs specified to become neurons, i.e. cells expressing high levels of DeltaD, stabilizes Epb4115 in the embryo. Together, these observations suggest that relatively high levels of Delta stabilize Epb4115 in NPCs specified as neurons. This, we suggest, helps coordinate NPC specification with Epb4115-dependent delamination and differentiation as neurons.

**KEY WORDS:** Notch signaling, Mind bomb, Zebrafish, Epb4115, Neurogenesis, Neuronal differentiation, Epithelial morphogenesis

## INTRODUCTION

Neural progenitor cells (NPCs) in the neuroepithelium are selected to become neurons by the process of lateral inhibition mediated by Notch signaling (Artavanis-Tsakonas et al., 1999; Schweisguth, 2004; Louvi and Artavanis-Tsakonas, 2006; Fiuza and Arias, 2007). NPCs selected to become neurons begin to express relatively high levels of proneural transcription factors that facilitate differentiation of neurons (Blader et al., 1997; Bertrand et al., 2002). The proneural factors determine expression of the Notch ligand Delta, which activates Notch in neighboring NPCs and prevents them from being specified as neurons. Expression of high levels of proneural factors in NPCs is followed by their delamination

and terminal differentiation into neurons, sometimes preceded by their migration away from where they were born (Pacary et al., 2012). The first morphological change in fate-determined NPCs is the disassembly of apical junctional complexes (AJCs) and the delamination of these cells from the neuroepithelium (Pacary et al., 2012; Itoh et al., 2013). AJCs, which are composed of tight junctions (TJs), adherens junctions (AJs) and desmosomes, are located at the apical end of the lateral membrane of epithelial and neuroepithelial cells and regulate cell adhesion and polarity (Shin et al., 2006; Meng and Takeichi, 2012; Desai et al., 2009; Spadaro et al., 2012). Although the precise mechanisms of AJC disassembly are not fully understood, studies have shown that downregulation of N-cadherin (Cadherin 2), a major component of neuroepithelial AJs (Redies and Takeichi, 1996; Gumbiner, 2005), is associated with the delamination and differentiation of fate-determined NPCs. *n-cadherin* expression is downregulated after fate determination (Hatta et al., 1987; Barami et al., 1994; Redies and Takeichi, 1996; Seki et al., 2007; Yagita et al., 2009; Kurusu et al., 2012; Paulson et al., 2014). Knockdown of *n-cadherin* disrupts AJs and facilitates apical detachment and differentiation of NPCs (Radice et al., 1997; Ganzler-Odenthal and Redies, 1998; Kadowaki et al., 2007; Zhang et al., 2010). Elimination of regulatory proteins of AJs results in similar phenotypes (Cappello et al., 2006). These results suggest that downregulation of N-cadherin is a prerequisite for delamination and may facilitate neuronal differentiation of fate-determined NPCs. However, the mechanisms that coordinate fate specification and downregulation of N-cadherin in fate-determined NPCs remain poorly understood.

Recently Rouso et al. showed that the Forkhead transcription factors FoxP2 and FoxP4 (FoxP2/4), expression of which is induced by the proneural transcription factors Ngn2 (Neurog3) and NeuroD4, directly downregulates expression of *n-cadherin* in fate-determined NPCs (Rouso et al., 2012; Pacary et al., 2012). As FoxP2/4 only reduces *n-cadherin* transcripts, existing N-cadherin protein at AJs in fate-determined NPCs also needs to be downregulated. However, the mechanisms that determine disassembly of existing AJs at the onset of neuronal differentiation remain poorly defined. In this study, we suggest that a membrane scaffold protein, Epb4115, post-translationally facilitates disassembly of AJs in fate-determined NPCs and works as a post-translational regulator that contributes to coordination of fate specification and delamination.

We identified Epb4115 as a substrate protein of Mib1 E3 ubiquitin ligase. Mib1 was originally identified as an E3 ubiquitin ligase for the Notch ligand Delta. Mib1 ubiquitylates and promotes endocytosis of Delta, which is essential for activation of Notch (Itoh et al., 2003; Chen and Casey Corliss, 2004; Lai et al., 2005; Le Borgne et al., 2005; Pitouli and Delidakis, 2005; Matsuda and Chitnis, 2009). Epb4115 belongs to a family of FERM proteins, which function as adaptors linking interacting cytoplasmic proteins to specific membrane compartments (Diakowski et al., 2006).

<sup>1</sup>Department of Cell Biology and Molecular Medicine, Rutgers, The State University of New Jersey, New Jersey Medical School, Newark, NJ 07103, USA. <sup>2</sup>Section on Neural Developmental Dynamics, Division of Developmental Biology, Eunice Kennedy Shriver National Institute of Child Health and Human Development, National Institutes of Health, Bethesda, MD 20892, USA. <sup>3</sup>Department of Pharmacology, Chiba University, Chiba 260-8675, Japan.

\*Authors for correspondence (matsudmi@njms.rutgers.edu; chitnisa@mail.nih.gov)

© M.M., 0000-0002-7495-5905

Previous studies suggested diverse functions for Epb4115 in the establishment of apical-basal polarity in neuroepithelial cells (Jensen et al., 2001; Jensen and Westerfield, 2004; Hsu et al., 2006; Laprise et al., 2006; Gosens et al., 2007), the promotion of epithelial-to-mesenchymal transition (EMT) (Lee et al., 2007; Hirano et al., 2008) and the regulation of apical membrane constriction of epithelial cells (Nakajima and Tanoue, 2010; Chu et al., 2013).

We show that in *epb4115*-deficient embryos, although neurogenesis is normal at the neural plate stage, there is mislocalization of neurons and a delay in neuronal differentiation after neurulation when AJCs become organized in the hindbrain neuroepithelium. Overexpression of Epb4115 promotes differentiation of neurons, suggesting that some function of Epb4115 facilitates differentiation of NPCs as neurons. We show that Mib1 ubiquitylates Epb4115 and facilitates its degradation. Furthermore, the efficacy of Mib1-mediated degradation of Epb4115 and its potential to disassemble AJs can be regulated by the abundance of Delta protein in a cell, which dynamically changes during fate specification and differentiation of neurons. Taken together, our observations suggest a potential model for how Epb4115 might coordinate cell fate specification and delamination of neuronal progenitors for subsequent neuronal differentiation.

## RESULTS

### Identification of Epb4115 as a novel Mib1-interacting protein

We identified Epb4115 as a novel interacting protein of Mib1 using a yeast two-hybrid screen. The screen identified six independent cDNA clones encoding a human FERM domain protein, erythrocyte membrane protein band 4.1 like 4B (EPB41L4; also known as EHM2), which is similar to Epb4115 [also known as Mosaic eyes (Moe)] in zebrafish (Fig. 1B). Epb4115 has a FERM domain and an FA (FERM-adjacent region) domain in its N terminus, which is well-conserved among the members of the band 4.1 superfamily (Baines, 2006; Tepass, 2009). The C-terminal domain of Epb4115 lacks the actin-binding domain but retains a conserved PDZ-binding domain.

Interaction between Epb4115 and Mib1 was confirmed by immunoprecipitation in HEK293 cells (Fig. 1C). We identified domains required for their interaction using various deletion constructs (Fig. 1A,B). A truncated N-terminal fragment of Mib1 (Mib1<sup>m178</sup>) was sufficient for the interaction with Epb4115 (Fig. 1C). A part of the C-terminal domain of Epb4115 containing aa 504–699 was required for the interaction with Mib1 (Fig. 1D).

### Epb4115 does not change Mib1 functions in Notch signaling

Next, we investigated the significance of the Mib1-Epb4115 interaction. One possibility was that Epb4115, which is typically localized on the cell surface (Fig. S1), interacts with Mib1 to promote its surface localization. This could facilitate interaction of Mib1 with Delta ligands and their subsequent endocytosis. Although Epb4115 did promote association of Mib1 with the plasma membrane *in vitro* (Fig. S1), DeltaD was primarily localized in intracellular puncta in *epb4115*-deficient *moe*<sup>b476</sup> mutants and *epb4115* morphants, as in wild-type embryos, and did not accumulate on the cell surface, as in *mib1*<sup>m178</sup> mutants (Fig. S2G–K). This suggests that Epb4115 is not required for Mib1-mediated DeltaD endocytosis, which is essential for effective Notch activation.

Notch-mediated lateral inhibition limits the number of NPCs that are allowed to differentiate as neurons and its failure increases neurogenesis. In *epb4115*-deficient embryos, however, there were no significant changes in expression of *neurogenin 1* (*ngn1*; *neurog1*), a basic helix-loop-helix (bHLH) transcription factor that

gives cells the potential to differentiate as neurons (Blader et al., 1997; Bertrand et al., 2002); *deltaA*, expression of which is determined by such proneural bHLH factors (Haddon et al., 1998); or *her4*, expression of which is determined by Notch signaling (Takke et al., 1999; Yeo et al., 2007) (Fig. S2A–F). This suggests that the number of NPCs specified as neurons is not increased and Notch signaling is not reduced in *epb4115*-deficient embryos.

It should be noted that some cell death was observed in the hindbrains of *epb4115*-deficient embryos (data not shown). p53 (Tp53)-dependent off-target effects of some morpholinos results in similar patterns of cell death (Robu et al., 2007; Schulte-Merker and Stainier, 2014). However, it is unlikely that the cell death observed in *epb4115* morphants simply reflects off-target effects of the *epb4115* morpholinos, as *moe*<sup>b476</sup> mutants have a similar pattern of increased cell death and co-injection of p53 morpholino reduces cell death in both *epb4115* mutants and morphants. To avoid confusion that could arise from changes associated with cell death, p53 morpholino was co-injected in all *epb4115* mutants and morphants and our analysis focused on changes that were not affected by p53-dependent cell death.

Although some reduction in *her4* expression was observed in *epb4115*-deficient embryos not co-injected with the p53 morpholino (Ohata et al., 2011), co-injection of the p53 morpholino restored *her4* expression (Fig. S4A,B). This suggested that the reduction in *her4* is specifically associated with p53-dependent cell death and does not reflect a general loss of Notch signaling in *epb4115*-deficient embryos. This conclusion was supported by the observations that there was no obvious increase in neurogenesis marked by expression of *ngn1* or *deltaA* (Fig. S2A–F) and that *epb4115*-deficient embryos did not show any problems with formation of somites in the caudal part of the trunk or the tail (data not shown), characteristic features of mutants with loss of Notch signaling (Lewis et al., 2009).

### Mib1 ubiquitylates Epb4115 and facilitates its degradation

As analysis of *epb4115*-deficient embryos did not appear to suggest an essential role for Epb4115 in determining Mib1-dependent Notch signaling, we asked if instead Mib1 interacts with Epb4115 to regulate functions of Epb4115 through its ubiquitylation as with some other substrates of Mib1 (Cajane et al., 2015; Kwon et al., 2013; Villumsen et al., 2013). When Epb4115 was co-expressed with Mib1, two bands of Epb4115 were observed (Fig. 1E). The upper band was not observed when a mutant form of Mib1 with no E3 Ub ligase activity (Mib1<sup>C1000S</sup>) was co-expressed (Fig. 1E). Co-expression of HA-Ubiquitin confirmed that the upper band is the ubiquitylated form of Epb4115. Mib1 co-expression facilitated degradation of Epb4115 in HEK293 cells (Fig. 1F) and exogenously expressed Epb4115 was stabilized in *mib1*<sup>ta52b</sup> mutants (Fig. 1G). These results suggest that Mib1 determines ubiquitylation-dependent degradation of Epb4115 and regulates its function by determining its stability. Interestingly, degradation of Epb4115 did not occur when the PDZ-binding domain at the C terminus of Epb4115 was deleted (Fig. S3), suggesting a requirement of the PDZ-binding domain for Mib1-mediated degradation of Epb4115.

### Mislocalization of neurons in *epb4115*-deficient embryos

To understand the functional significance of the regulation of Epb4115 stability in neurogenesis, we looked for changes in the developing neural tube that might be related to previously described roles for Epb4115 in epithelial morphogenesis. Previous studies showed that Epb4115 interacts with the apical determinant Crb,

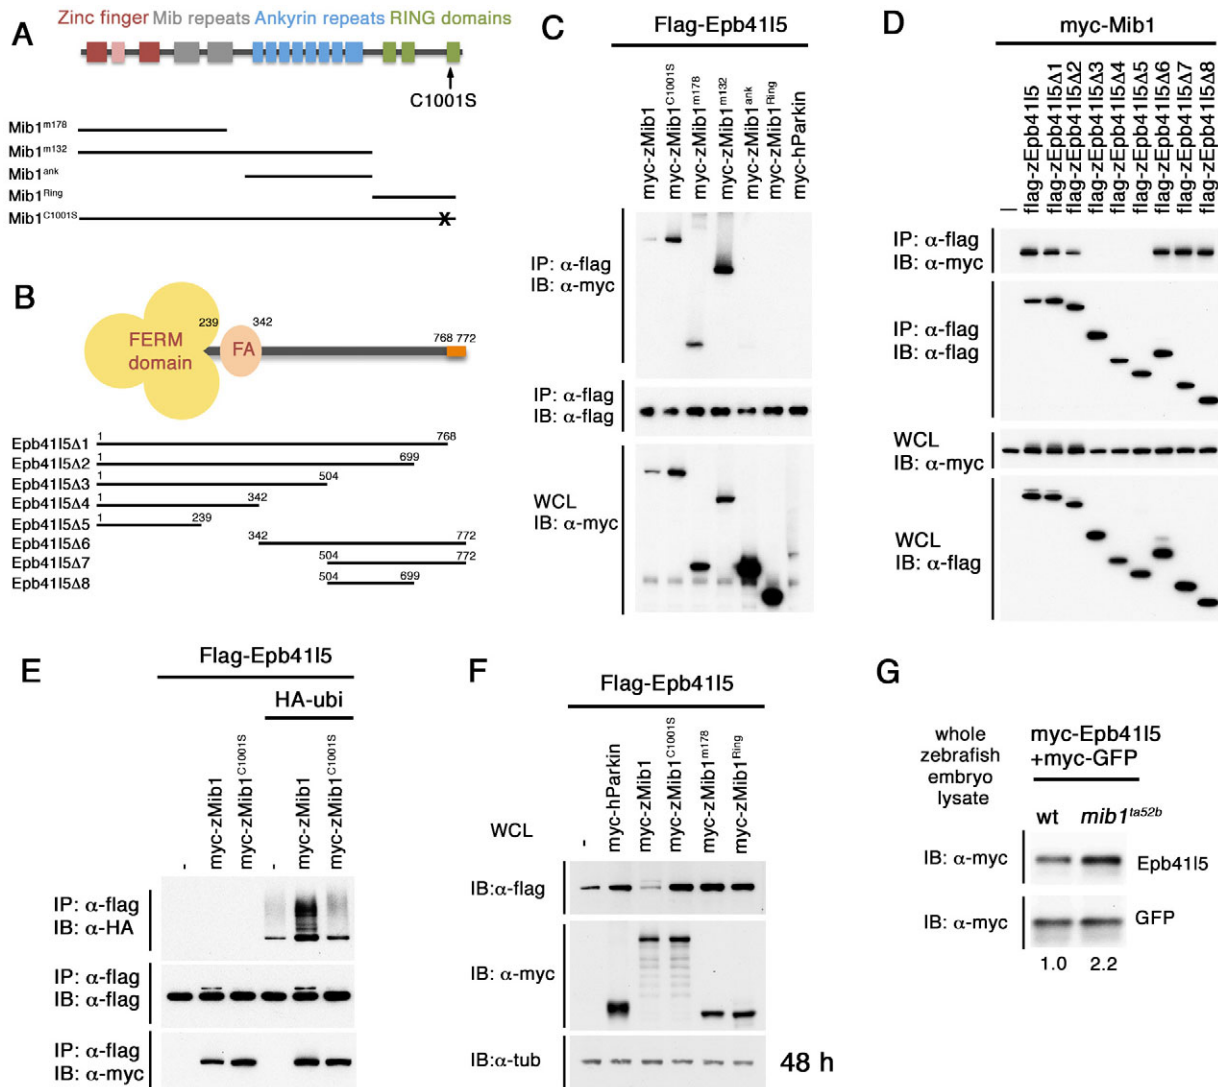

**Fig. 1. Epb4115 is a Mib1-interacting protein that is ubiquitylated by Mib1.** (A) Structure of Mib1 protein. Truncated forms of Mib1 are shown below. Mib1<sup>m132</sup>, which contains zinc finger and Mib repeats, was used for the yeast two-hybrid screen. C1001S, C to S mutation (shown as X) in the RING domain. (B) Structure of Epb4115 protein, which contains a FERM domain and an FA (FERM-adjacent region) domain at the N terminus and PDZ-binding domain at the C terminus (orange). Truncated forms of Epb4115 are shown below. (C) Epb4115 interacts with the N-terminal domain of Mib1. Full-length Epb4115 was co-expressed with various truncated forms of Mib1 in HEK293 cells. (D) Mib1 interacts with the C-terminal domain of Epb4115. Full-length Mib1 was co-expressed with various forms of Epb4115 in HEK293 cells. Mib1 was immunoprecipitated by Epb4115 forms containing amino acids 504–609. (E) Epb4115 is ubiquitylated by Mib1, but not by Mib1<sup>C1001S</sup>. (F) Mib1 facilitates degradation of Epb4115. A functional RING domain is required for its degradation. (G) Epb4115 is stabilized in zebrafish *mib1*<sup>ta52b</sup> mutants. *In vitro*-transcribed *myc-epb4115* mRNA was microinjected into one-cell-stage embryos together with *myc-gfp* mRNA as standardized control. Total embryo lysate was extracted from *mib1*<sup>ta52b</sup> mutant embryos and wild-type siblings at 24 hpf. Numbers below indicate relative band intensity of individual bands.

restricts subcellular distribution of Crb to the ventricular surface of the neuroepithelium and organizes apico-basal polarity in neuroepithelium (Jensen et al., 2001; Jensen and Westerfield, 2004; Hsu et al., 2006; Laprise et al., 2006; Gosens et al., 2007). In zebrafish, *epb4115* was originally identified as *mosaic eyes* (*moe*) and Crb2a protein was more diffusely distributed in the neuroepithelium in *moe*<sup>b476</sup> mutants (Hsu et al., 2006; Laprise et al., 2006) and in *epb4115*-deficient embryos (Fig. 2A,B). This change was accompanied by poorly organized neuroepithelial AJs during the progression of neural tube formation (Fig. 2D–I), resulting in a failure of AJC organization and brain ventricle formation (Fig. 2B,N,O; Jensen et al., 2001; Hsu et al., 2006).

Along with the failure of brain ventricle formation, we noticed mislocalization of neurons in the hindbrain of *epb4115*-deficient embryos. After NPCs are selected for becoming neurons, they

detach from the apical ventricular surface and translocate to the basal/pial side of the neural tube where they express markers of differentiation such as HuC (Elavl3) (Kim et al., 1996). Those cells are no longer attached to the ventricular surface (Fig. 2J–M). In *epb4115*-deficient embryos, however, some HuC-positive cells were still localized near the midline of the hindbrain where the apical ventricular surface is normally formed in wild-type embryos (Fig. 2P,Q arrowheads). This observation is similar to the mislocalization of Isl1-positive motor neurons in *moe*<sup>rw306</sup> mutants (Ohata et al., 2011). Another proposed function of Epb415 is to facilitate disassembly of epithelial AJs and promote EMT (Lee et al., 2007; Hirano et al., 2008). Because delamination of fate-determined NPCs requires disassembly of neuroepithelial AJs, we hypothesized that Epb4115 might facilitate disassembly of neuroepithelial AJs and that the aberrant localization of HuC-



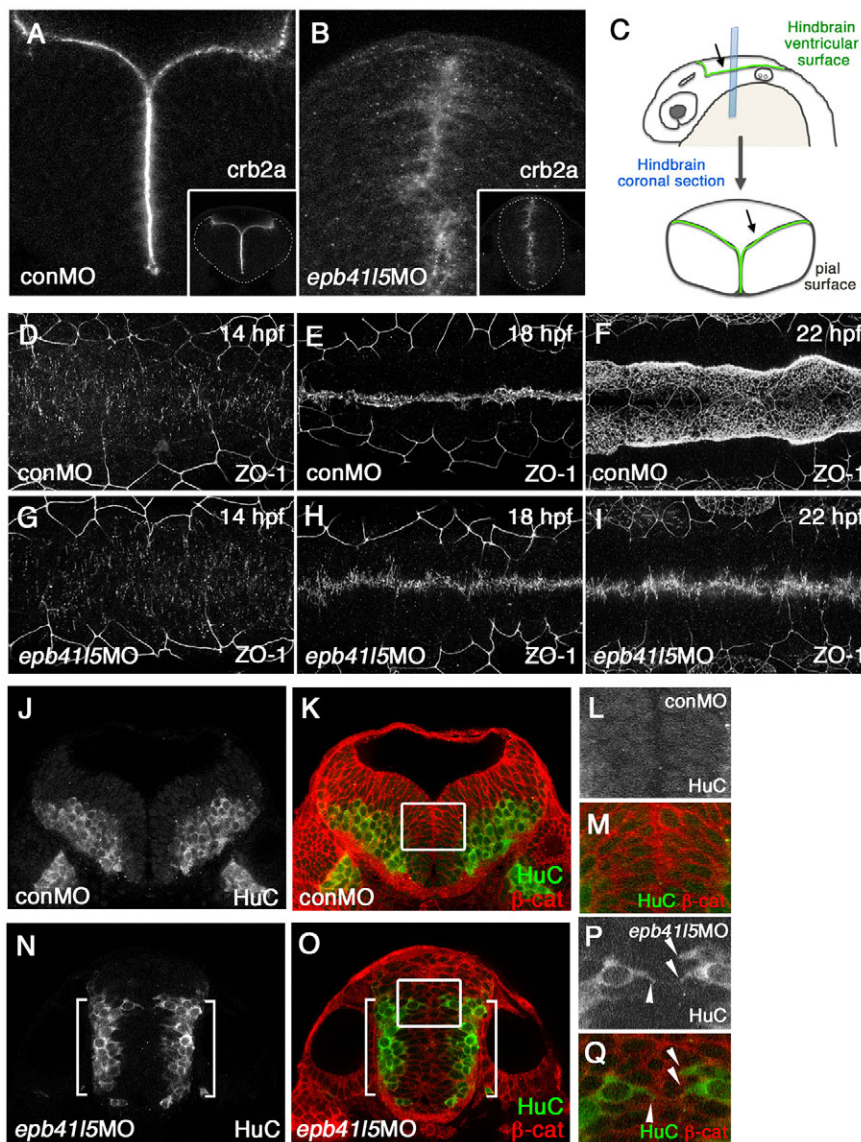

**Fig. 2. Epb4115 is required for the formation of the hindbrain ventricle and the proper localization of neurons.** (A–C) Coronal sections showing mislocalization of Crb2a in the hindbrain of *epb4115* morphants. Whereas Crb2a is restricted to a well-defined apical/ventricular surface in wild-type embryos injected with control morpholino (MO) (conMO), Crb2a is diffusely expressed in *epb4115* morphants (*epb4115*MO). Lower-magnification images are shown in insets. Diagram in C illustrates approximate positions of coronal sections in the hindbrain. (D–I) Failure of organization of ZO-1-positive AJs and formation of the hindbrain ventricle in *epb4115* morphants. Confocal images were taken from the dorsal side of embryos. The anterior is to the left and the posterior is to the right. In control MO embryos, accumulation of ZO-1<sup>+</sup> puncta at 14 hpf is gradually aligned to the midline of the hindbrain and forms a continuous line at 18 hpf. The hindbrain ventricle inflates at 22 hpf. In *epb4115* morphants, ZO-1 accumulation at 14 hpf is gradually aligned to the midline of the hindbrain but fails to form a continuous line at 18 hpf. The hindbrain ventricle is not formed at 22 hpf. (J–Q) Coronal sections showing mislocalization of HuC-expressing neurons in *epb4115* morphants. In control MO embryos, HuC-positive neurons are localized at the pial region of the hindbrain and do not have contacts with the ventricular surface. In *epb4115* morphants, a fraction of HuC-positive cells were located near the midline of the hindbrain and maintain contacts with the prospective ‘ventricular’ surface. Boxed areas in K and O are shown at higher magnification in L, M and P, Q, respectively. Brackets indicate HuC-positive neurons which are still localized near the basal/pial surface of the hindbrain. Arrowheads indicate HuC-positive cells which are localized near the midline.

positive cells might reflect their less effective disassembly in *epb4115*-deficient embryos.

#### A delay in AJ disassembly and neuronal differentiation in *epb4115*-deficient embryos

Although some HuC-positive neurons were mislocalized in *epb4115*-deficient embryos, most HuC-positive neurons were still properly localized near the basal/pial surface of the hindbrain (Fig. 2N,O, brackets). This suggested that although Epb4115 might be required for efficient disassembly of neuroepithelial AJs, it is not an absolute requirement. To demonstrate more clearly that Epb4115 facilitates disassembly of neuroepithelial AJs, we challenged the underlying mechanisms by increasing the number of NPCs undergoing differentiation. We treated embryo with DAPT, a  $\gamma$ -secretase inhibitor (Geling et al., 2002), to block Notch signaling. This forced a larger fraction of NPCs to be specified as neurons and consequently increased the number of delaminating NPCs.

Following 5 h of exposure to DAPT, highly organized AJCs in wild-type embryos disappeared from the ventricular surface of the hindbrain (Fig. 3A–D',I–J') and the hindbrain was filled by HuC-positive neurons (Fig. 3E–H',M–N'). In *epb4115* morphants,

by contrast, there was a delay in the loss of ZO-1-positive AJs (Fig. 3K–L',O–Q). It should be noted that AJC formation failed in *epb4115*-deficient embryos: ZO-1-associated AJs were not properly organized at the midline along the prospective ventricular surface and the hindbrain ventricle did not inflate. These observations are related to aberrant apico-basal polarity and mislocalization of ion pumps, which prevents effective inflation of the ventricles (Lowery and Sive, 2005). Despite the disorganization of AJCs, it was clear that a significant number of AJs remained after 5 h of DAPT treatment (Fig. 3K–L',Q). This suggested that neuroepithelial AJs are not effectively disassembled in *epb4115*-deficient embryos.

The persistence of AJs in *epb4115*-deficient embryos was coupled with a small increase in HuC-positive neurons (Fig. 3M–P',R), suggesting a delay in neuronal differentiation. It remained possible that the number of HuC-positive cells was reduced because DAPT had not blocked Notch signaling in *epb4115*-deficient embryos as effectively as in wild-type embryos. However, reduced expression of *her4* confirmed that DAPT had effectively inhibited Notch signaling in *epb4115* morphants (Fig. S4). Furthermore, DAPT treatment dramatically increased DeltaD expression in the hindbrain (Fig. 4J,J',P,P'), consistent with the failure of Notch-mediated

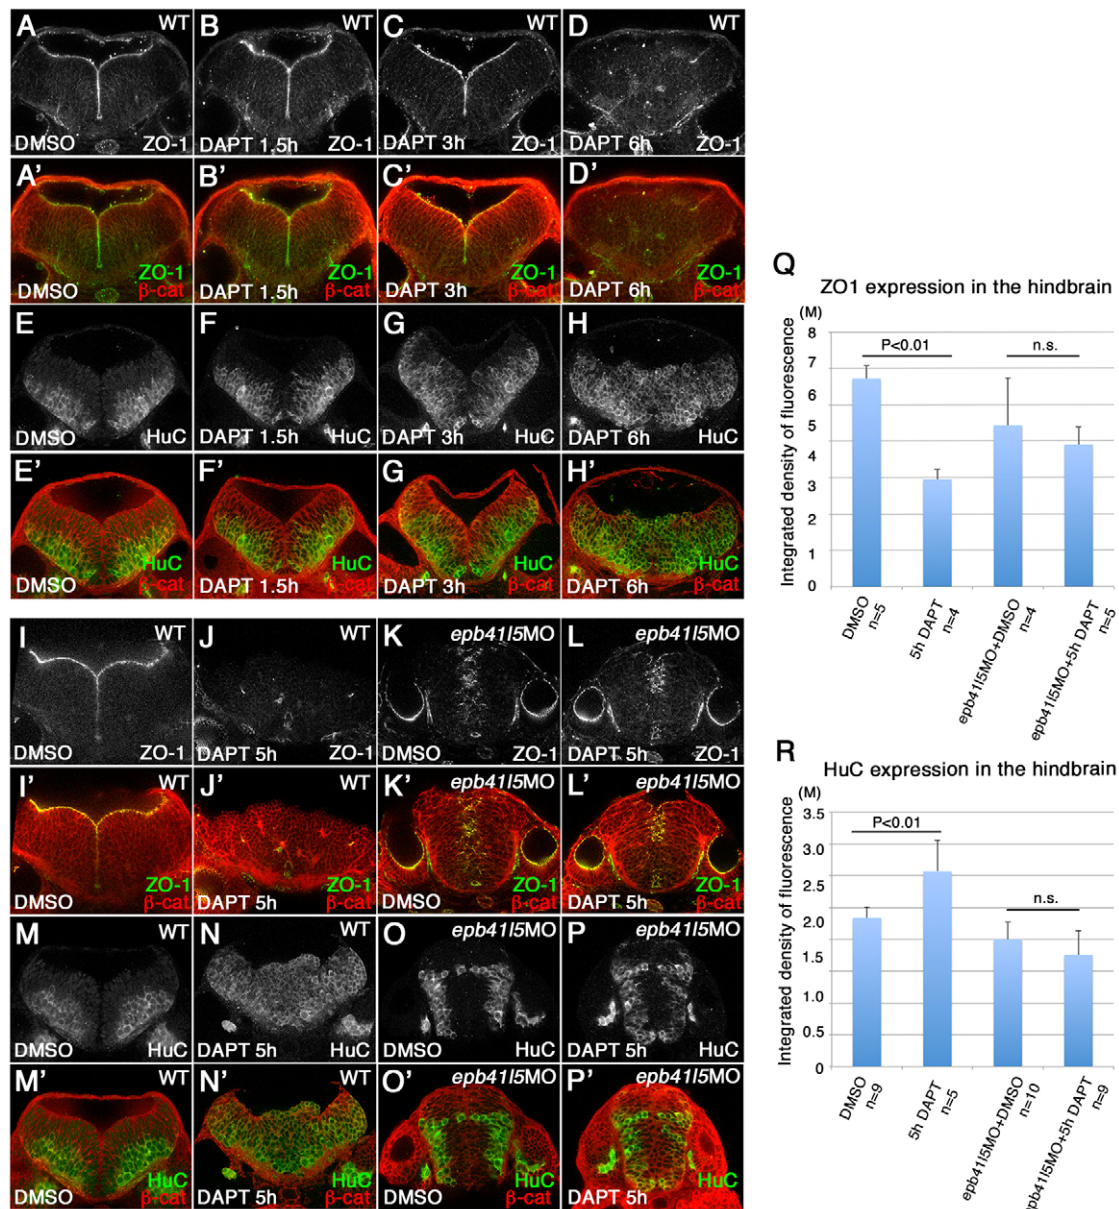

**Fig. 3. Delays in disassembly of AJs and neuronal differentiation in *epb41l5* morphants.** (A–H') Timeline of AJ disassembly (A–D') and differentiation of neurons (E–H') during DAPT treatment in wild-type embryos. Embryos were treated with 50  $\mu$ M DAPT for 1.5, 3 or 6 h and immunostained at 32 hpf. Loss of Notch signaling by DAPT treatment results in loss of AJs and premature differentiation of NPCs into neurons. (I–P') Delays in AJ disassembly and differentiation of neurons in *epb41l5* embryos. Embryos were treated with DAPT for 5 h. In control embryos (WT), 5 h DAPT treatment eliminates ZO-1 at the apical/ventricular surface, accompanied by a corresponding increase in HuC. In *epb41l5* morphants, there is a much smaller reduction in ZO-1 immunostaining and no obvious increase in HuC immunostaining. (Q,R) Quantitative analyses of ZO-1 and HuC expression. Total fluorescence intensities of ZO-1 and HuC in the hindbrain were measured in individual confocal images using ImageJ. Error bars represent s.d. n.s., not significant. M, million integrated pixel intensity.

lateral inhibition allowing many more NPCs to be specified as neurons in *epb41l5* morphants.

#### Intermediate progenitor population is increased in *epb41l5*-deficient embryos

Although expression of *deltaD* and DeltaD is upregulated in NPCs selected to become neurons, the upregulation is normally short-lived. In wild-type embryos, the expression of *deltaD* transcripts increased after 2 h of DAPT treatment but decreased after 4 h (Fig. 4A–F). Similarly, an initial increase in DeltaD protein decreased after 6 h (Fig. 4G–L'). The timing of this reduced expression of DeltaD coincided with a robust increase in the

expression of HuC (Fig. 3H,H'). This suggests that NPCs selected to become neurons transiently express high levels of DeltaD but downregulate DeltaD once their differentiation begins.

In *epb41l5*-deficient embryos, *deltaD*/DeltaD expression was increased following exposure to DAPT. However, DeltaD expression remained high in *epb41l5* morphants after 8 h of DAPT treatment (Fig. 4R,R',S) when it had already decreased in wild-type embryos (Fig. 4L,L',S). This suggests that although inhibition of Notch signaling had effectively increased NPCs specified to become neurons, their differentiation was delayed and they remained in an 'intermediate' state for an extended period in *epb41l5*-deficient embryos. Taken together, these results suggest



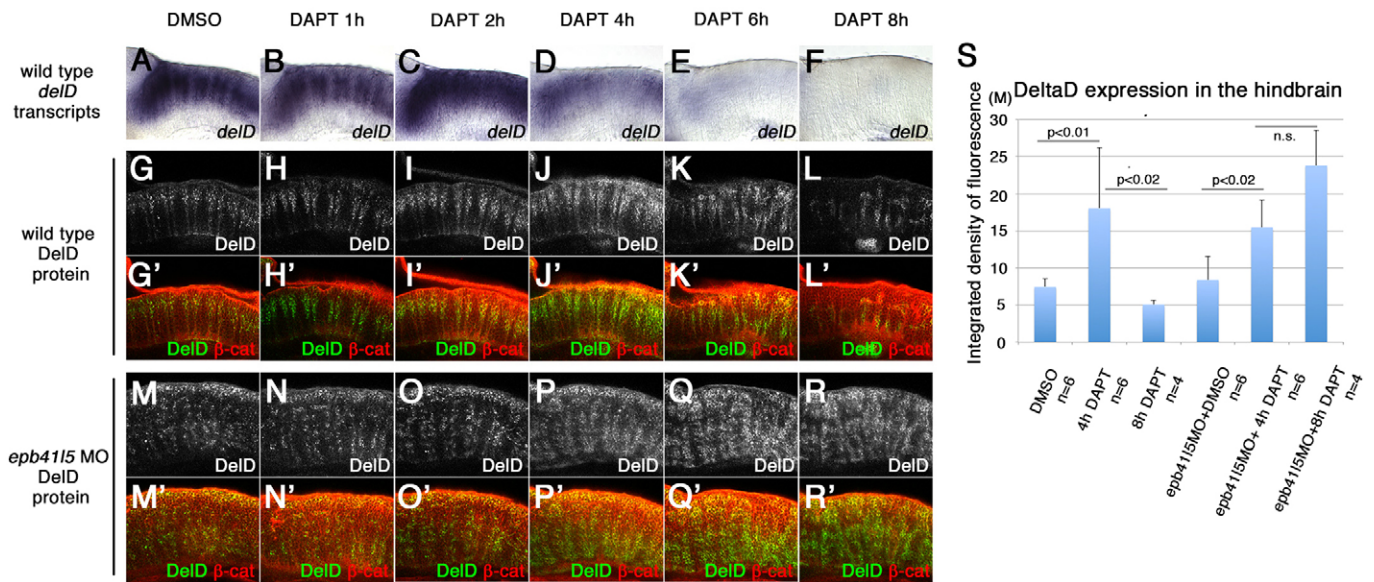

**Fig. 4. 'Intermediate' neuronal progenitor population expressing DeltaD is increased in *epb4115*-deficient embryos.** (A-L') Timeline of disappearance of DeltaD in progenitors during neuronal differentiation in wild-type embryos. Two hours of DAPT treatment increases expression of *deltaD* transcripts, followed by increased expression of DeltaD protein at 4 h. Expression of *deltaD* and DeltaD diminishes after 6 and 8 h of DAPT treatment. (M-R') Continued expression of DeltaD in *epb4115* morphants. Increased DeltaD expression persists after 8 h of DAPT treatment. (S) Quantitative analysis of DeltaD expression. Total fluorescence intensity of DeltaD in the hindbrain was measured in individual confocal slices using ImageJ. Error bars represent s.d. n.s., not significant. M, million integrated pixel intensity.

that the delay in AJ disassembly observed in *epb4115*-deficient embryos is linked to a delay in differentiation.

#### Neuronal differentiation is delayed in *epb4115*-deficient NPCs

The disorganization of AJs and the failure to inflate the hindbrain ventricle in *epb4115* embryos raised the possibility that the delays in AJ disassembly and differentiation might be secondary effects of the disorganized neuroepithelium. It was important to determine whether reduced Epb4115 function contributes to the same problems in a context in which there is no broad disorganization of AJCs in the neuroepithelium. We examined the fate of *epb4115*-deficient cells transplanted into wild-type embryos with otherwise normal morphology and apicobasal polarity. mRNA encoding myc-membrane-tethered GFP (myc-membGFP) was co-injected into donor embryos to identify transplanted cells. Host embryos were then immunostained at 34 hours post-fertilization (hpf) to determine what fraction of transplanted cells had begun differentiation as neurons (Fig. 5A-C). In a total of 428 cells transplanted from control embryos, 7.41% cells expressed HuC (Fig. 5D). By contrast, from a total of 221 cells transplanted from *epb4115*-deficient embryos, only 2.56% cells expressed HuC (Fig. 5D). These results confirm that loss of *epb4115* in individual cells suppresses their differentiation as neurons in the absence of broader disorganization of AJCs, and the delay in neuronal differentiation is not a secondary effect of the disorganized hindbrain structure in *epb4115*-deficient embryos.

#### Neuronal differentiation is facilitated in NPCs with increased Epb4115 expression

Next, we examined whether increased expression of Epb4115 facilitates delamination and differentiation of neurons. We injected one-cell-stage embryos with plasmids encoding *gfp-epb4115* or *myc-membgfp* downstream of a heat shock promoter (Fig. 5E). In this context, GFP-Epb4115 or myc-membGFP were expressed in a mosaic pattern following induction of expression with heat shock.

We optimized the amount of injected DNA so that expression of GFP was induced in less than 5% of cells. Six hours after heat-shock treatment, we examined what fraction of GFP-positive cells had begun differentiation as neurons. We counted a total of 623 cells expressing myc-membGFP and 277 cells expressing GFP-Epb4115. Of those cells expressing GFP-Epb4115 18.77% expressed HuC, whereas only 5.14% of cells expressing myc-membGFP expressed HuC (Fig. 5F). These results are consistent with Epb4115 expression promoting differentiation of NPCs as neurons.

#### A partial knockdown of *n-cadherin* facilitates neuronal differentiation in *epb4115*-deficient embryos

Previous studies showed that downregulation of N-cadherin is required for delamination and differentiation of NPCs (Hatta et al., 1987; Barami et al., 1994; Radice et al., 1997; Ganzler-Odenthal and Redies, 1998; Redies and Takeichi, 1996; Kadowaki et al., 2007; Seki et al., 2007; Yagita et al., 2009; Zhang et al., 2010; Kurusu et al., 2012; Paulson et al., 2014). Because Epb4115 promotes EMT by modulating E-cadherin (Cadherin 1), a major component of epithelial AJs (Lee et al., 2007; Hirano et al., 2008), we hypothesized that Epb4115 might reduce the stability of N-cadherin and help disassembly of existing neuroepithelial AJs, complementing transcriptional mechanisms that reduce *n-cadherin* expression (Rousso et al., 2012). In this context, N-cadherin might be more stable at AJs in *epb4115*-deficient NPCs. We hypothesized that a partial knockdown of *n-cadherin* might reduce N-cadherin and facilitate AJ disassembly to restore timely differentiation of NPCs in *epb4115*-deficient embryos.

A complete loss of N-cadherin function disorganizes the structure and integrity of the hindbrain (Pujic and Malicki, 2001; Lele et al., 2002; Erdmann et al., 2003; Malicki et al., 2003; Masai et al., 2003). We used 0.1 ng of *n-cadherin* morpholino for microinjection to minimize the effects of *n-cadherin* knockdown on the overall morphology and distribution of HuC-positive neurons in wild-type embryos (Fig. 6B,B'). This partial knockdown of *n-cadherin*

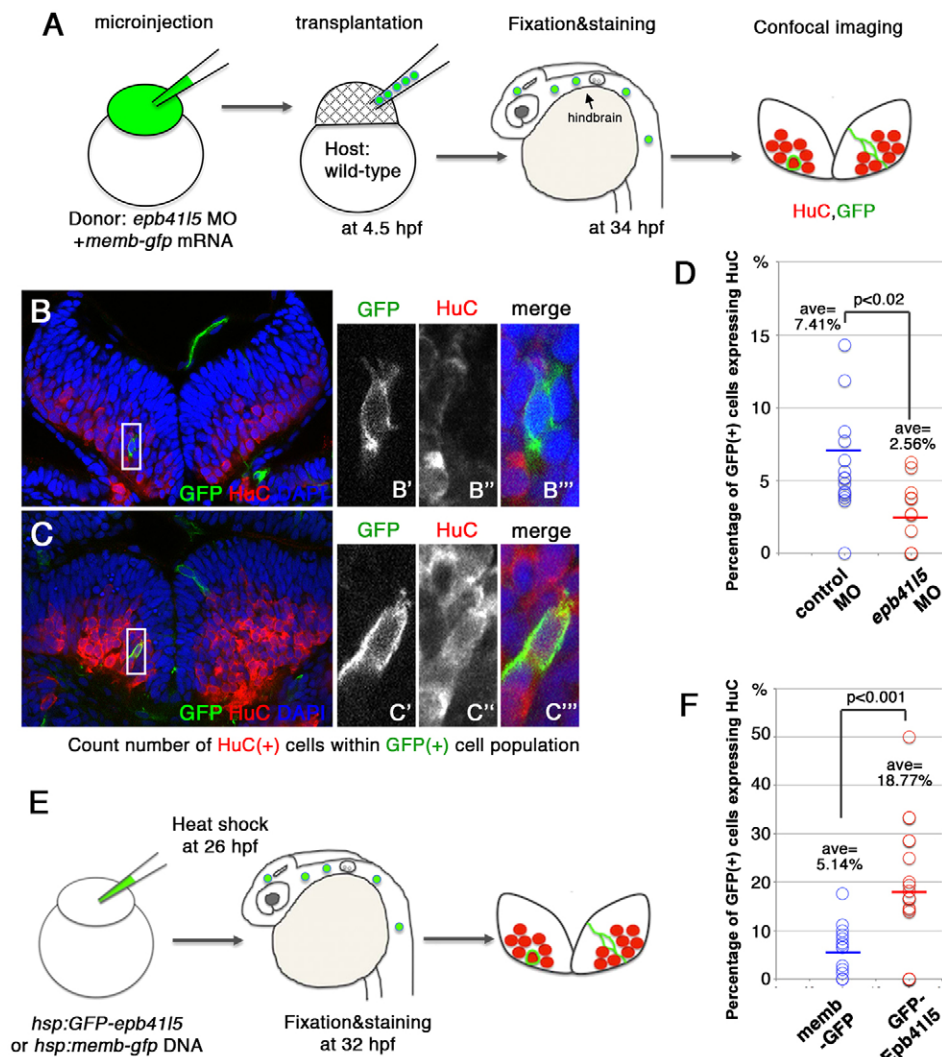

**Fig. 5. Epb4115 facilitates differentiation of neurons.** (A) Schematic of the experiment. *epb4115* morpholino was injected into one-cell-stage embryos with *memb-gfp* mRNA. Twenty to thirty cells were transplanted to wild-type embryos. Ratios of HuC-expressing cells within total GFP-expressing transplanted cells were analyzed in individual confocal images. (B,C) Representative images of HuC-positive neurons in the hindbrain. Boxed areas in B and C are enlarged in the right-hand panels. The cell in B does not express HuC, suggesting an undifferentiated NPC. The cell in C does express HuC, suggesting a differentiated neuron. (D) Reduced expression of *epb4115* attenuates differentiation of neurons. Out of the 428 control transplanted cells in 16 embryos that were analyzed, 7.41% cells expressed HuC. Out of the 221 *epb4115*-deficient transplanted cells in 12 embryos that were analyzed, 2.56% cells expressed HuC. ave, average. (E) Schematic of the experiment. Plasmid DNAs encoding *membGFP* or *GFP-Epb4115* were microinjected. At 6 h after heat-shock treatment, HuC expression in GFP-expressing cells was analyzed at 32 hpf. (F) *GFP-Epb4115* facilitated differentiation of neurons. Out of the 623 *membGFP*-expressing cells in eight embryos that were analyzed, 5.14% cells expressed HuC. Out of the 277 cells overexpressing *GFP-Epb4115* in six embryos that were analyzed, 18.77% cells expressed HuC.

nevertheless reduced mislocalization of HuC-positive neurons in the hindbrain of *epb4115*-deficient embryos (Fig. 6D–G), suggesting that partial reduction of *n-cadherin* facilitated delamination of neurons in *epb4115*-deficient embryos. Partial knockdown of *n-cadherin* also reduced the persistent DeltaD expression following 6 h of DAPT treatment (Fig. 6N–S). These results support the hypothesis that slower disassembly of AJs in *epb4115*-deficient embryos delays differentiation of fate-determined NPCs that express high levels of DeltaD. Taken together, these results suggest that Epb4115 facilitates neuroepithelial AJ disassembly for the timely differentiation of fate-determined NPCs.

#### Epb4115 protein is stabilized in NPCs specified as neurons

We identified Epb4115 as a Mib1-interacting protein and showed that Mib1 ubiquitylates Epb4115 to promote its degradation (Fig. 1E–G). In addition, our observations suggested that Epb4115 facilitates disassembly of AJs in NPCs (Figs 3, 4). Based on these observations, we hypothesized that Mib1-mediated degradation of Epb4115 might be selectively reduced in NPCs specified as neurons; the resulting stabilization of Epb4115 may promote disassembly of AJs, facilitating effective delamination and subsequent differentiation as neurons.

If Mib1-mediated degradation of Epb4115 is reduced in NPCs specified as neurons, overall stability of Epb4115 should be

increased in embryos in which inhibition of Notch signaling allows a larger number of NPCs to become neurons. We did not examine the stability of endogenous Epb4115 because inhibition of Notch signaling alters the number of cells expressing *epb4115* (Fig. S6) and, hence, Epb4115. Instead, we microinjected mRNAs encoding Myc-Epb4115 and HA-RFP, and examined the effect of Notch inhibition on their stability. The stability of Myc-Epb4115 was increased in DAPT-treated embryos, whereas the stability of HA-RFP was not affected (Fig. 7A). These observations are consistent with increased stability of Epb4115 protein in embryos in which a larger number of NPCs are selected to become neurons.

#### Epb4115 and DeltaD compete for Mib1 binding to determine the stability of Epb4115

Next, we explored the mechanisms underlying Epb4115 stabilization in NPCs selected to become neurons. Previous studies showed that the N-terminal domain of Mib1 binds to Delta (Itoh et al., 2003; Chen and Casey Corliss, 2004; Palardy and Chitnis, 2015). We showed that the same N-terminal domain interacts with Epb4115 (Fig. 1C). This raised the possibility that Epb4115 and Delta might compete for Mib1 binding. Delta expression dynamically changes during neurogenesis; Delta expression is relatively high in NPCs selected to become neurons and low in neighboring NPCs. If Delta and Epb4115 compete for



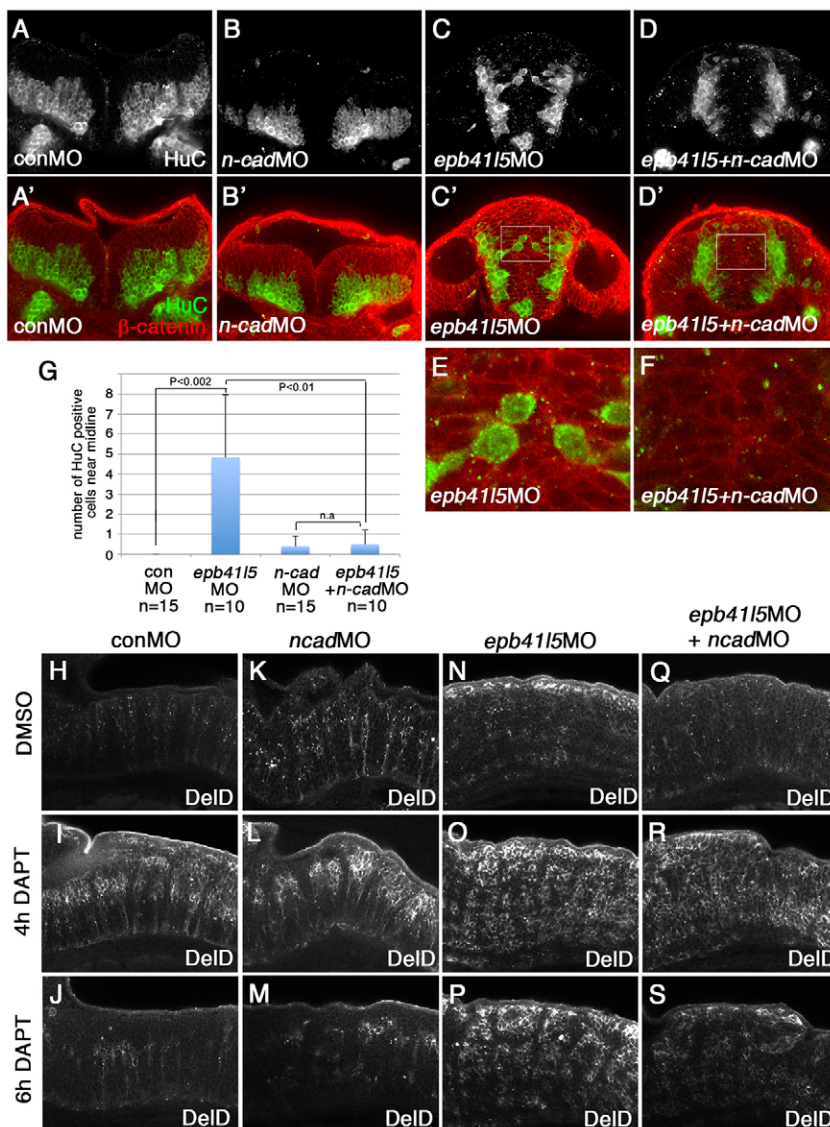

**Fig. 6. Reduced expression of *n-cadherin* rescues a delay of delamination and differentiation of neurons in *epb4115*-deficient embryos.** (A–F) Coronal sections showing localization of HuC-expressing neurons in the hindbrain. HuC-positive cells are only localized at the pial side of the hindbrain in control MO- or 0.1 ng *n-cadherin* MO-injected embryos. A fraction of HuC-positive cells are mislocalized near the midline in *epb4115* morphants. The mislocalization of HuC-positive cells is rescued by partial knockdown of *n-cadherin*. The boxed areas in C' and D' are enlarged in E and F, respectively. (G) Statistical analysis of distribution of HuC-positive cells in the hindbrain. Error bars represent s.d. n.s., not significant. (H–S) DeltaD expression in the hindbrain. Lateral views. After 4 h of DAPT treatment DeltaD expression is increased. After 8 h of DAPT treatment, whereas DeltaD expression is decreased in control embryos and *n-cadherin* morphants, DeltaD expression persists in *epb4115* morphants. The persistent expression of DeltaD in *epb4115* morphants is rescued by partial knockdown of *n-cadherin*.

Mib1 binding, the amount of Delta in a cell could determine what fraction of Mib1 interacts with and degrades Epb4115. This could determine the relative stability of Epb4115 and its potential to disassemble AJs in NPCs.

To test this hypothesis, we carried out a biochemical competition assay in HEK293 cells. We examined whether co-expression of DeltaD changes the amount of Epb4115 interacting with Mib1 or the stability of Epb4115. Myc-Mib1 was co-immunoprecipitated with Flag-Epb4115 and destabilized Flag-Epb4115 (Fig. 7B, lanes 2,3). When HA-Delta was co-expressed, however, a smaller amount of Myc-Mib1 was co-immunoprecipitated with Flag-Epb4115 and Flag-Epb4115 was stabilized (Fig. 7B, lanes 3–6). These results suggest that increasing DeltaD expression can reduce the amount of Mib1 available to determine Epb4115 degradation in a cell. The DeltaD-Mib1 interaction was also decreased when Epb4115 was co-expressed (Fig. 7C), supporting our competition model. Taken together, these results suggest that Epb4115 and DeltaD can compete for Mib1 binding and that the abundance of Delta can regulate the stability of Epb4115 *in vitro*. Increasing expression of Delta in NPCs specified as neurons would be expected to capture increasing proportions of Mib1, leaving less Mib1 available for ubiquitylation and degradation of Epb4115. Because of technical

limitations, we were not able to show *in vivo* that increasing Delta expression stabilizes endogenous Epb4115 in individual NPCs specified to become neurons. However, consistent with this possibility, we showed that increasing the number of Delta-expressing NPCs specified to become neurons stabilizes exogenously provided Epb4115 (Fig. 7A).

## DISCUSSION

We have shown that Mib1 ubiquitylates Epb4115, promoting its degradation. We have also shown that Epb4115 and DeltaD compete to interact with Mib1, and that this competition can regulate Mib1-dependent degradation of Epb4115. These observations and previous studies that have demonstrated a role for Epb4115 in disassembly of AJs in epithelial cells indicate a relatively simple post-translational mechanism for helping the coordination of fate specification, delamination and differentiation of neurons. We suggest that the competition between Epb4115 and Delta for Mib1 binding could determine the stability of Epb4115 and hence its potential to disassemble AJs in NPCs (Fig. 7D). NPCs selected to become neurons express high levels of proneural factors and Delta. In these cells, we suggest, a greater proportion of Mib1 interacts with Delta and less with Epb4115. This could reduce Mib1-



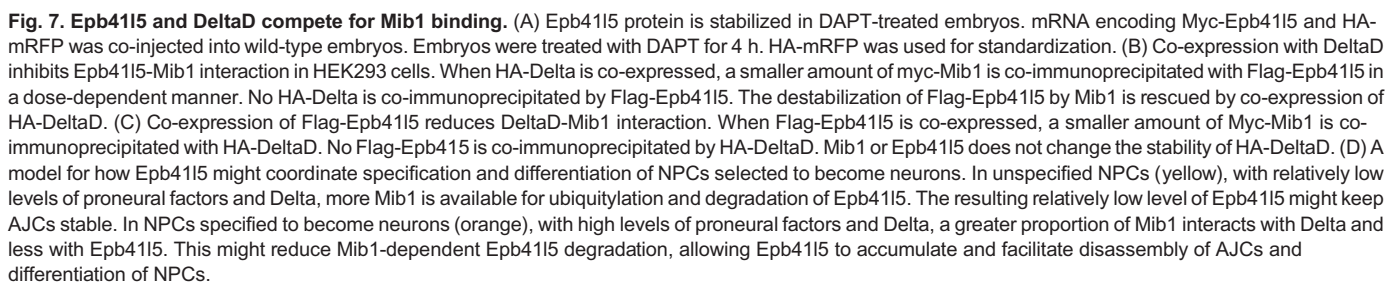

Under normal circumstances, the ectopic expression of Epb4115 (Fig. 5) or the inhibition of N-cadherin function in an NPC (Zhang et al., 2010; Rouso et al., 2012) promotes its differentiation as a

Although our study has focused on changes related to less effective disassembly of AJs, we recognize that some changes in *epb4115*-deficient embryos might be related to other functions of Epb4115. A characteristic phenotype of *epb4115*-deficient embryos is the aberrant morphology of the hindbrain, which is associated with the failure of the organization of AJCs lining the putative ventricular surface and subsequent failure in brain ventricle inflation. These defects are believed to be associated with functions of Epb4115 in limiting the distribution of Crb to the apical/ventricular surface of the neural tube (Hsu et al., 2006; Laprise et al., 2006; Gosens et al., 2007). These observations raised the possibility that the disorganization of the neuroepithelium and neural tube morphogenesis might contribute to the delays in delamination and differentiation of neurons in *epb4115*-deficient

embryos. However, transplanted *epb4115*-deficient cells in the wild-type hindbrain showed a delay in neuronal differentiation (Fig. 5D). This suggests that the delays in neuronal differentiation in *epb4115*-deficient cells are cell-autonomous and the broader disorganization of the hindbrain morphology is not the primary cause of the delays. Although differentiation of *epb4115*-deficient cells was delayed, it is not entirely clear that the delay in differentiation is only determined by the delay in delamination. At least in some cases, differentiation was also delayed in *epb4115*-deficient cells that had apparently delaminated (Fig. 5B). This raises the possibility that although a Epb4115-dependent delay in delamination may contribute to a delay in neuronal differentiation, other Epb4115-dependent mechanisms may also contribute to this delay.

We have analyzed embryos that have a broad loss of Epb4115 functions and have described changes that are best understood in the context of the specific role of Epb4115 in delamination and differentiation of NPCs. Although our observations did not suggest a clear role for Epb4115 in Notch signaling, previous analysis of the *moe<sup>rw306</sup>* allele, which specifically lacks the ability to interact with Crb, led to a different conclusion (Ohata et al., 2011). They suggested that Crb directly interacts with Notch and inhibits its activation, whereas Epb4115 reverses this inhibition by binding to Crb. In this manner, Epb4115 facilitates Notch signaling. This conclusion was supported with the observation that *her4* expression was reduced in *moe<sup>rw306</sup>* mutants. However, we did not focus on reduced expression of *her4* as it was associated with cell death. Furthermore, there were no other changes in either neurogenesis or somitogenesis that were consistent with failure of Notch signaling. Therefore, we could not conclude that changes we had described were related to potential roles of Epb4115 in Notch signaling.

Can we reconcile these apparently contradictory conclusions? Our study focuses on the potential role of Epb4115 in facilitating delamination and differentiation of NPCs that have been selected to become neurons. We suggest that NPCs, with relatively low levels of Notch activation, selected to become neurons, express relatively high levels of Epb4115. One possibility is that Epb4115 facilitates their differentiation as neurons by facilitating delamination. However, Epb4115 might have additional roles in NPCs that have not been selected to become neurons. In these NPCs, Epb4115 might interact with Crb and organize apicobasal polarity. Furthermore, Epb4115 might interact with Crb in these NPCs to facilitate Notch signaling by preventing interactions with Crb, as suggested by (Ohata et al., 2011).

There is, however, an alternative explanation for why our analysis of *epb4115* morphants might have come to a different conclusion about a potential role of Epb4115 in Notch signaling. Ohata et al. have examined changes in the *moe<sup>rw306</sup>* allele in which Epb4115 lacks a domain required for its interaction with Crb (Ohata et al., 2011). Hence, functions of Epb4115 that require Crb interactions might be specifically impaired in *moe<sup>rw306</sup>* mutants. In *moe<sup>rw306</sup>* mutants, Crb is aberrantly expressed on the cell surface, which could inhibit Notch signaling. However, although the Epb4115<sup>*rw306*</sup> mutant protein still binds to Mib1, we found that it is not effectively ubiquitinated or degraded by Mib1 (data not shown). Therefore, it is possible that some changes observed in *moe<sup>rw306</sup>* mutants might be the result of increased expression of a stabilized version of Epb4115. One consequence of this could be increased AJs disassembly and an accompanying reduction of Notch signaling. In this context, it would be interesting to determine whether knockdown of *epb4115* in *moe<sup>rw306</sup>* mutants leads to a recovery of Notch signaling. Although we avoided analysis of phenotypes associated with cell death, cell death is a

real consequence of reduced Epb4115 function and previous studies have also shown an increase in p53-dependent apoptosis when Crb function is reduced (Yamaguchi et al., 2004). Understanding the link between Epb4115 and Crb, p53-dependent apoptosis and changes in Notch signaling will require further investigation.

## MATERIALS AND METHODS

### Plasmids

Zebrafish Epb4115 was purchased from Open Biosystems (BC066560). Epb4115 full-length and truncated versions were PCR amplified and cloned into pCS2-Flag expression vector. HA-Ubiquitin and Myc-Mib1 plasmids were previously described (Itoh et al., 2003).

### Yeast two-hybrid screen

The Ras Recruitment System (Broder et al., 1998) and human Fetal Brain cDNA Library (Stratagene) were used.

### Fish maintenance and lines

Fish lines were maintained under standard conditions (Kimmel et al., 1995). The use of animals was approved by the Institutional Animal Care and Use Committee at Rutgers and NIH. AB wild-type fish were obtained from ZIRC. *moe<sup>b476</sup>* mutant line was obtained from Dr Westerfield (Jensen and Westerfield, 2004). *mib1<sup>ta52b</sup>* and *mib1<sup>m178</sup>* mutants were described previously (Itoh et al., 2003). Male and female fish were used.

### Morpholino antisense oligonucleotide micro injection

Morpholino oligonucleotides (Table S1) were purchased from Gene Tools. p53 morpholino was co-injected to prevent p53-dependent cell death and associated off-target effects of morpholinos (Robu et al., 2007).

### Whole-mount *in situ* hybridization

Probes for *in situ* hybridization were labeled by digoxigenin-UTP (Roche). *In situ* hybridization was performed as described previously (Matsuda and Chitnis, 2009). BCIP/NBT substrate kit (Vector Laboratories) was used for the coloration.

### Whole-mount immunocytochemistry

Embryos were fixed with either 4% paraformaldehyde (PFA) in PBS overnight (anti-Crb2a antibody) or with 10% trichloroacetic acid for 30 min on ice (anti-DeltaD and anti-ZO-1 antibodies). Embryos were incubated with primary antibodies (Table S2) overnight at 4°C. Embryos were then incubated with Alexa488- or Cy3-conjugated secondary antibodies (715-165-151, 711-165-152, 715-545-151, 711-545-152; Jackson ImmunoResearch) at 1:500. An LSM510 confocal microscope (Zeiss) or an A1R confocal microscope system (Nikon) was used for imaging.

### DAPT treatment

DAPT (50 μM; Calbiochem) was applied to embryos for the appropriate durations as described in Results to block Notch signaling (Geling et al., 2002). Control embryos were treated with DMSO.

### Immunostaining of cultured cells

HEK293 and MCDK cells were purchased from ATCC. Cells were transfected with FuGENE6 (Roche) following the manufacturer's instructions. Cells were fixed for 15 min with 4% PFA. Cells were incubated with primary antibodies (Table S2) for 2 h and then incubated with fluorescent secondary antibodies (715-165-151, 711-165-152, 715-545-151, 711-545-152; Jackson ImmunoResearch) for 45 min.

### Immunoprecipitation and western blotting

HEK293 cells were harvested 24–48 h after transfection. Cell lysates were incubated with primary antibodies (Table S2) and with protein G sepharose. Beads were washed and boiled in SDS sample buffer for western blotting. Chemiluminescent signals were quantified using a Chemidoc Bioimager (Bio-Rad).



### In vitro transcription and mRNA preparation for microinjection

pCS2-myc-Epb4115 and pCS2-myc-membGFP plasmids were linearized by *NotI*. Capped mRNAs were *in vitro* synthesized using mMessage mMachine SP6 kit (Ambion). After purification using G-25 spin columns (GE BioHealth), mRNAs were microinjected into one-cell-stage embryos.

### DNA microinjection and heat-shock treatment

GFP-Epb4115 and myc-membGFP were inserted downstream of the heat shock protein 70 promoter. Plasmid DNAs were microinjected into one-cell-stage embryos. At 24 hpf, embryos were heat-shock treated by being placed in a 42°C water bath for 30 min. After a 6 h incubation, embryos were immunostained with anti-HuC and anti-myc antibodies (Table S2).

### Transplantation

Control morpholino or *epb4115* morpholino was microinjected into one-cell-stage embryos together with p53 morpholino and mRNA encoding Myc-membGFP. Twenty to thirty cells were transplanted from donor embryos into host wild-type embryos at 4.5 hpf. Embryos at 32 hpf were immunostained with anti-HuC and anti-myc antibodies (Table S2).

### Quantification and statistical analyses

Quantification of fluorescence signal in whole-mount immunostained embryos was performed by analyzing individual single-plane images. The integrated fluorescence intensities of anti-ZO-1 and anti-HuC immunostaining in the hindbrain were measured using ImageJ software. The hindbrain regions were defined by anti- $\beta$ -catenin immunostaining. The one-tailed *t*-test was performed for comparison of individual groups using GraphPad software.

### Acknowledgements

We thank members of M.M. laboratory and A.B.C laboratory for technical assistant and comments on the manuscript. We thank Abbie Jensen and Jane McGlade for discussions and help during an early phase of this project.

### Competing interests

The authors declare no competing or financial interests.

### Author contributions

Conceptualization: M.M., A.B.C.; Methodology: M.M., A.B.C.; Formal analysis: M.M.; Investigation: M.M., K.R., G.P., N.S., H.L., D.D.N., M.I.; Writing – original draft preparation: M.M.; Writing – review and editing: M.M., D.D.N., A.B.C.; Funding acquisition: M.M., A.B.C.

### Funding

This research was supported by the National Institute of Child Health and Human Development (NICHD, NIH) [HD062561 to M.M.] and NICHD intramural program [HD001012 to A.B.C.]. Deposited in PMC for release after 12 months.

### Supplementary information

Supplementary information available online at <http://dev.biologists.org/lookup/doi/10.1242/dev.138743.supplemental>

### References

- Artavanis-Tsakonas, S., Rand, M. D. and Lake, R. J. (1999). Notch signaling: cell fate control and signal integration in development. *Science* **284**, 770–776.
- Baines, A. J. (2006). A FERM-adjacent (FA) region defines a subset of the 4.1 superfamily and is a potential regulator of FERM domain function. *BMC Genomics* **7**, 85.
- Barami, K., Kirschenbaum, B., Lemmon, V. and Goldman, S. A. (1994). N-cadherin and Ng-CAM/8D9 are involved serially in the migration of newly generated neurons into the adult songbird brain. *Neuron* **13**, 567–582.
- Bertrand, N., Castro, D. S. and Guillemot, F. (2002). Proneural genes and the specification of neural cell types. *Nat. Rev. Neurosci.* **3**, 517–530.
- Blader, P., Fischer, N., Gradwohl, G., Guillemot, F. and Strahle, U. (1997). The activity of neurogenin1 is controlled by local cues in the zebrafish embryo. *Development* **124**, 4557–4569.
- Broder, Y. C., Katz, S. and Aronheim, A. (1998). The ras recruitment system, a novel approach to the study of protein-protein interactions. *Curr. Biol.* **8**, 1121–1130.
- Cajane, L., Glatzer, T. and Nigg, E. A. (2015). The E3 ubiquitin ligase Mib1 regulates Plk4 and centriole biogenesis. *J. Cell Sci.* **128**, 1674–1682.
- Cappello, S., Attardo, A., Wu, X., Iwasato, T., Itohara, S., Wilsch-Brauninger, M., Eilken, H. M., Rieger, M. A., Schroeder, T. T., Huttner, W. B. et al. (2006). The Rho-GTPase cdc42 regulates neural progenitor fate at the apical surface. *Nat. Neurosci.* **9**, 1099–1107.
- Chen, W. and Casey Corliss, D. (2004). Three modules of zebrafish Mind bomb work cooperatively to promote Delta ubiquitination and endocytosis. *Dev. Biol.* **267**, 361–373.
- Chu, C.-W., Gerstenzang, E., Ossipova, O. and Sokol, S. Y. (2013). Lulu regulates Shroom-induced apical constriction during neural tube closure. *PLoS ONE* **8**, e81854.
- Desai, B. V., Harmon, R. M. and Green, K. J. (2009). Desmosomes at a glance. *J. Cell Sci.* **122**, 4401–4407.
- Diakowski, W., Grzybek, M. and Sikorski, A. F. (2006). Protein 4.1, a component of the erythrocyte membrane skeleton and its related homologue proteins forming the protein 4.1/FERM superfamily. *Folia Histochem. Cytobiol.* **44**, 231–248.
- Erdmann, B., Kirsch, F.-P., Rathjen, F. G. and More, M. I. (2003). N-cadherin is essential for retinal lamination in the zebrafish. *Dev. Dyn.* **226**, 570–577.
- Fiuzza, U.-M. and Arias, A. M. (2007). Cell and molecular biology of Notch. *J. Endocrinol.* **194**, 459–474.
- Ganzler-Odenthal, S. I. and Redies, C. (1998). Blocking N-cadherin function disrupts the epithelial structure of differentiating neural tissue in the embryonic chicken brain. *J. Neurosci.* **18**, 5415–5425.
- Geling, A., Steiner, H., Willem, M., Bally-Cuif, L. and Haass, C. (2002). A gamma-secretase inhibitor blocks Notch signaling in vivo and causes a severe neurogenic phenotype in zebrafish. *EMBO Rep.* **3**, 688–694.
- Gosens, I., Sessa, A., den Hollander, A. I., Letteboer, S. J. F., Belloni, V., Arends, M. L., Le Bivic, A., Cremers, F. P. M., Broccoli, V. and Roepman, R. (2007). FERM protein EPB41L5 is a novel member of the mammalian CRB-MPP5 polarity complex. *Exp. Cell Res.* **313**, 3958–3970.
- Gumbiner, B. M. (2005). Regulation of cadherin-mediated adhesion in morphogenesis. *Nat. Rev. Mol. Cell Biol.* **6**, 622–634.
- Haddon, C., Smithers, L., Schneider-Maunoury, S., Coche, T., Henrique, D. and Lewis, J. (1998). Multiple delta genes and lateral inhibition in zebrafish primary neurogenesis. *Development* **125**, 359–370.
- Hatakeyama, J., Wakamatsu, Y., Nagafuchi, A., Kageyama, R., Shigemoto, R. and Shimamura, K. (2014). Cadherin-based adhesions in the apical endfoot are required for active Notch signaling to control neurogenesis in vertebrates. *Development* **141**, 1671–1682.
- Hatta, K., Takagi, S., Fujisawa, H. and Takeichi, M. (1987). Spatial and temporal expression pattern of N-cadherin cell adhesion molecules correlated with morphogenetic processes of chicken embryos. *Dev. Biol.* **120**, 215–227.
- Hirano, M., Hashimoto, S., Yonemura, S., Sabe, H. and Aizawa, S. (2008). EPB41L5 functions to post-transcriptionally regulate cadherin and integrin during epithelial-mesenchymal transition. *J. Cell Biol.* **182**, 1217–1230.
- Hsu, Y.-C., Willoughby, J. J., Christensen, A. K. and Jensen, A. M. (2006). Mosaic Eyes is a novel component of the Crumbs complex and negatively regulates photoreceptor apical size. *Development* **133**, 4849–4859.
- Itoh, M., Kim, C.-H., Palardy, G., Oda, T., Jiang, Y.-J., Maust, D., Yeo, S.-Y., Lorick, K., Wright, G. J., Ariza-McNaughton, L. et al. (2003). Mind bomb is a ubiquitin ligase that is essential for efficient activation of Notch signaling by Delta. *Dev. Cell* **4**, 67–82.
- Itoh, Y., Tyssowski, K. and Gotoh, Y. (2013). Transcriptional coupling of neuronal fate commitment and the onset of migration. *Curr. Opin. Neurobiol.* **23**, 957–964.
- Jensen, A. M. and Westerfield, M. (2004). Zebrafish mosaic eyes is a novel FERM protein required for retinal lamination and retinal pigmented epithelial tight junction formation. *Curr. Biol.* **14**, 711–717.
- Jensen, A. M., Walker, C. and Westerfield, M. (2001). mosaic eyes: a zebrafish gene required in pigmented epithelium for apical localization of retinal cell division and lamination. *Development* **128**, 95–105.
- Kadowaki, M., Nakamura, S., Machon, O., Krauss, S., Radice, G. L. and Takeichi, M. (2007). N-cadherin mediates cortical organization in the mouse brain. *Dev. Biol.* **304**, 22–33.
- Kim, C.-H., Ueshima, E., Muraoka, O., Tanaka, H., Yeo, S.-Y., Huh, T.-L. and Miki, N. (1996). Zebrafish elav/HuC homologue as a very early neuronal marker. *Neurosci. Lett.* **216**, 109–112.
- Kimmel, C. B., Ballard, W. W., Kimmel, S. R., Ullmann, B. and Schilling, T. F. (1995). Stages of embryonic development of the zebrafish. *Dev. Dyn.* **203**, 253–310.
- Kurusu, M., Katsuki, T., Zinn, K. and Suzuki, E. (2012). Developmental changes in expression, subcellular distribution, and function of Drosophila N-cadherin, guided by a cell-intrinsic program during neuronal differentiation. *Dev. Biol.* **366**, 204–217.
- Kwon, D. Y., Dimitriadis, M., Terzic, B., Cable, C., Hart, A. C., Chitnis, A., Fischbeck, K. H. and Burnett, B. G. (2013). The E3 ubiquitin ligase mind bomb 1 ubiquitinates and promotes the degradation of survival of motor neuron protein. *Mol. Biol. Cell* **24**, 1863–1871.
- Lai, E. C., Roegiers, F., Qin, X., Jan, Y. N. and Rubin, G. M. (2005). The ubiquitin ligase Drosophila Mind bomb promotes Notch signaling by regulating the localization and activity of Serrate and Delta. *Development* **132**, 2319–2332.
- Laprise, P., Beronja, S., Silva-Gagliardi, N. F., Pelikka, M., Jensen, A. M., McGlade, C. J. and Tepass, U. (2006). The FERM protein Yurt is a negative

- regulatory component of the Crumbs complex that controls epithelial polarity and apical membrane size. *Dev. Cell* **11**, 363-374.
- Le Borgne, R., Remaud, S., Hamel, S. and Schweisguth, F.** (2005). Two distinct E3 ubiquitin ligases have complementary functions in the regulation of delta and serrate signaling in *Drosophila*. *PLoS Biol.* **3**, e96.
- Lee, J. D., Silva-Gagliardi, N. F., Tepass, U., McGlade, C. J. and Anderson, K. V.** (2007). The FERM protein Epb4.1f5 is required for organization of the neural plate and for the epithelial-mesenchymal transition at the primitive streak of the mouse embryo. *Development* **134**, 2007-2016.
- Lele, Z., Folchert, A., Concha, M., Rauch, G. J., Geisler, R., Rosa, F., Wilson, S. W., Hammerschmidt, M. and Bally-Cuif, L.** (2002). parachute/n-cadherin is required for morphogenesis and maintained integrity of the zebrafish neural tube. *Development* **129**, 3281-3294.
- Lewis, J., Hanisch, A. and Holder, M.** (2009). Notch signaling, the segmentation clock, and the patterning of vertebrate somites. *J. Biol.* **8**, 44.
- Louvi, A. and Artavanis-Tsakonas, S.** (2006). Notch signalling in vertebrate neural development. *Nat. Rev. Neurosci.* **7**, 93-102.
- Lowery, A. and Sive, H.** (2005). Initial formation of zebrafish brain ventricles occurs independently of circulation and requires the nagie oko and snakehead/atp1a1a.1 gene products. *Development* **132**, 2057-2067.
- Malicki, J., Jo, H. and Pujic, Z.** (2003). Zebrafish N-cadherin, encoded by the glass onion locus, plays an essential role in retinal patterning. *Dev. Biol.* **259**, 95-108.
- Masai, I., Lele, Z., Yamaguchi, M., Komori, A., Nakata, A., Nishiwaki, Y., Wada, H., Tanaka, H., Nojima, Y., Hammerschmidt, M. et al.** (2003). N-cadherin mediates retinal lamination, maintenance of forebrain compartments and patterning of retinal neurites. *Development* **130**, 2479-2494.
- Matsuda, M. and Chitnis, A. B.** (2009). Interaction with Notch determines endocytosis of specific Delta ligands in zebrafish neural tissue. *Development* **136**, 197-206.
- Meng, W. and Takeichi, M.** (2012). Adherens junction: molecular architecture and regulation. *Cold Spring Har. Perspect. Biol.* **1**, a002899.
- Nakajima, H. and Tanoue, T.** (2010). Epithelial cell shape is regulated by Lulu proteins via myosin-II. *J. Cell Sci.* **123**, 555-566.
- Ohata, S., Aoki, R., Kinoshita, S., Yamaguchi, M., Tsuruoka-Kinoshita, S., Tanaka, H., Wada, H., Watabe, S., Tsuboi, T., Masai, I. et al.** (2011). Dual roles of Notch in regulation of apically restricted mitosis and apicobasal polarity of neuroepithelial cells. *Neuron* **69**, 215-230.
- Pacary, E., Martynoga, B. and Guillemot, F.** (2012). Crucial first steps: the transcriptional control of neuron delamination. *Neuron* **74**, 209-211.
- Palardy, G. and Chitnis, A. B.** (2015). Identification of the Mind Bomb1 interaction domain in zebrafish DeltaD. *PLoS ONE* **10**, e0127864.
- Paulson, A. F., Prasad, M. S., Thuringer, A. H. and Manzerra, P.** (2014). Regulation of cadherin expression in nervous system development. *Cell Adhes. Migr.* **8**, 19-28.
- Pitsouli, C. and Delidakis, C.** (2005). The interplay between DSL proteins and ubiquitin ligases in Notch signaling. *Development* **132**, 4041-4050.
- Pujic, Z. and Malicki, J.** (2001). Mutation of the zebrafish glass onion locus causes early cell-nonautonomous loss of neuroepithelial integrity followed by severe neuronal patterning defects in the retina. *Dev. Biol.* **234**, 454-469.
- Radice, G. L., Rayburn, H., Matsunami, H., Knudsen, K. A., Takeichi, M. and Hynes, R. O.** (1997). Developmental defects in mouse embryos lacking N-cadherin. *Dev. Biol.* **181**, 64-78.
- Redies, C. and Takeichi, M.** (1996). Cadherins in the developing central nervous system: an adhesive code for segmental and functional subdivisions. *Dev. Biol.* **180**, 413-423.
- Robu, M. E., Larson, J. D., Nasevicius, A., Beiraghi, S., Brenner, C., Farber, S. A. and Ekker, S. C.** (2007). p53 activation by knockdown technologies. *PLoS Genet.* **3**, e78.
- Roussio, D. L., Pearson, C. A., Gaber, Z. B., Miquelajauregui, A., Li, S., Portera-Cailliau, C., Morrissey, E. E. and Novitsch, B. G.** (2012). Foxp-mediated suppression of N-cadherin regulates neuroepithelial character and progenitor maintenance in the CNS. *Neuron* **74**, 314-330.
- Schulte-Merker, S. and Stainier, D. Y.** (2014). Out with the old, in with the new: reassessing morpholino knockdowns in light of genome editing technology. *Development* **141**, 3103-3104.
- Schweisguth, F.** (2004). Regulation of notch signaling activity. *Curr. Biol.* **14**, R129-R138.
- Seki, T., Namba, T., Mochizuki, H. and Onodera, M.** (2007). Clustering, migration, and neurite formation of neural precursor cells in the adult rat hippocampus. *J. Comp. Neurol.* **502**, 275-290.
- Shin, K., Fogg, V. C. and Margolis, B.** (2006). Tight junctions and cell polarity. *Annu. Rev. Cell Dev. Biol.* **22**, 207-235.
- Spadaro, D., Tapia, R., Pulimeno, P. and Citi, S.** (2012). The control of gene expression and cell proliferation by the epithelial apical junctional complex. *Essays Biochem.* **53**, 83-93.
- Takke, C., Dornseifer, P. V., Weizsacker, E. and Campos-Ortega, J. A.** (1999). her4, a zebrafish homologue of the *Drosophila* neurogenic gene E(spl), is a target of NOTCH signalling. *Development* **126**, 1811-1821.
- Tepass, U.** (2009). FERM proteins in animal morphogenesis. *Curr. Opin. Genet. Dev.* **19**, 357-367.
- Villumsen, B. H., Danielsen, J. R., Povlsen, L., Sylvestersen, K. B., Merdes, A., Beli, P., Yang, Y.-G., Choudhary, C., Nielsen, M. L., Møllgaard, N. et al.** (2013). A new cellular stress response that triggers centriolar satellite reorganization and ciliogenesis. *EMBO J.* **32**, 3029-3040.
- Yagita, Y., Sakurai, T., Tanaka, H., Kitagawa, K., Colman, D. R. and Shan, W.** (2009). N-cadherin mediates interaction between precursor cells in the subventricular zone and regulates further differentiation. *J. Neurosci. Res.* **87**, 3331-3342.
- Yamaguchi, M., Hirose, F., Inoue, Y. H., Ohno, K., Yoshida, H., Hayashi, Y., Deak, P. and Matsukage, A.** (2004). Genetic link between p53 and genes required for formation of the zonula adherens junction. *Cancer Sci.* **95**, 436-441.
- Yeo, S.-Y., Kim, M., Kim, H.-S., Huh, T.-L. and Chitnis, A. B.** (2007). Fluorescent protein expression driven by her4 regulatory elements reveals the spatiotemporal pattern of Notch signaling in the nervous system of zebrafish embryos. *Dev. Biol.* **301**, 555-567.
- Zhang, J., Woodhead, G. J., Swaminathan, S. K., Noles, S. R., McQuinn, E. R., Pisarek, A. J., Stocker, A. M., Mutch, C. A., Funatsu, N. and Chenn, A.** (2010). Cortical neural precursors inhibit their own differentiation via N-cadherin maintenance of beta-catenin signaling. *Dev. Cell* **18**, 472-479.
